# Supplementary material
Source: publisher figshare collection journal article supplement (https://gsajournals.figshare.com/ndownloader/files/28864884)
Supplement: Supplementary file 1 [file 28864884]

## Sheet: Table S1.1
Table S1.1: Developmental stages and samples used for the RNA-Seq approach.
Developmental stage	label	content	Date frozen	Remark	FG-code
embryos	1 ei 1	1 egg cluster on paper (~100 eggs)	2018-10-31		FG1848_01
	1 ei 2	1 egg cluster on paper (~100 eggs)	2018-10-31		FG1848_02
	1 ei 3	1 egg cluster on paper (~100 eggs)	2018-10-31		FG1848_03
	4 ei 2	1 egg cluster on paper (~100 eggs)	2018-10-31	Extra sample (reserve); from couple 4 ipv couple 1
1st instar larvae	1 EL1 1	1 early first instar larva (non-fed)	2018-11-02		FG1848_04
	1 EL1 2	1 early first instar larva (non-fed)	2018-11-02		FG1848_05
	1 EL1 3	1 early first instar larva (non-fed)	2018-11-02		FG1848_06
	1 EL1 4	3 early first instar larvae (non-fed)	2018-11-02	Extra samples (reserve); three larvae in 1 tube!
3rd instar larvae	1 L3 1	1 early third instar larva	2018-11-06		FG1848_07
	1 L3 2	1 early third instar larva	2018-11-06		FG1848_08
	1 L3 3	1 early third instar larva	2018-11-06		FG1848_09
	1 L3 4	9 early third instar larvae	2018-11-06	Extra samples (reserve); nine larvae in 1 tube!
pupae	1 P 1	1 female pupa (second day pupa)	2018-11-14		FG1848_10
	1 P 2	1 female pupa (second day pupa)	2018-11-14		FG1848_11
	1 P 3	1 female pupa (second day pupa)	2018-11-14		FG1848_12
	1 P 4	3 female pupae (second day pupa)	2018-11-14	Extra samples (reserve); three pupae in 1 tube!
female adults	1-F1	1 female adult (just emerged)	2018-11-20		FG1848_13
	1-F2	1 female adult (just emerged)	2018-11-20		FG1848_14
	1-F3	1 female adult (just emerged)	2018-11-20		FG1848_15
	1-F4	1 female adult (just emerged)	2018-11-20	Extra sample (reserve)
male adults	1-M1	1 male adult (just emerged)	2018-11-21		FG1848_16
	1-M2	1 male adult (just emerged)	2018-11-21		FG1848_17
	1-M3	1 male adult (just emerged)	2018-11-21		FG1848_18
	1-M4	1 male adult (just emerged)	2018-11-23	Extra sample (reserve)

## Sheet: Table S1.2
Table S1.2: Quality of developmental stages and samples used for the RNA-Seq approach.
		bioanalyzer		500 ng RNA			librarie concentr.
FG code	op RNA epp	RNA (ng/ul)	RIN	ul RNA	ul H2O	INDEX	ng/ul	Size	nM
FG1848_01	1 ei 1	253	N/A	2	48	UD0033		444	16.6
FG1848_02	1 ei 2	362	N/A	1.4	48.6	UD0034		448	12.3
FG1848_03	1 ei 3	302	N/A	1.7	48.3	UD0035		451	13.8
FG1848_04	1 EL1 1	19	N/A	26.3	23.7	UD0036		445	22.5
FG1848_05	1 EL1 2	15	N/A	30	20	UD0037		436	45.7
FG1848_06	1 EL1 3	7	N/A	30	20	UD0038		435	53.7
FG1848_07	1 L3 1	404	N/A	1.2	48.8	UD0039		407	70.4
FG1848_08	1 L3 2	417	N/A	1.2	48.8	UD0040		395	85.9
FG1848_09	1 L3 3	344	N/A	1.5	48.5	UD0041		412	29.9
FG1848_10	1 P 1	2550	N/A	1	49	UD0042		396	37.6
FG1848_11	1 P 2	1773	N/A	1	49	UD0043		435	84
FG1848_12	1 P 3	1767	N/A	1	49	UD0044		424	160
FG1848_13	1-F1	1112	N/A	1	49	UD0045		418	138
FG1848_14	1-F2	1079	N/A	1	49	UD0046		416	90.1
FG1848_15	1-F3	931	N/A	1	49	UD0047		413	109
FG1848_16	1-M1	570	N/A	1	49	UD0048		423	127
FG1848_17	1-M2	435	N/A	1.1	48.9	UD0049		400	44
FG1848_18	1-M3	617	N/A	1	49	UD0050		398	82.6

## Sheet: Table S1.3
Table S1.2: Details on RNA-Seq run results.
Sample #	Sample code	FASTQ file	# clusters	Date
FG1848_01	1 ei 1	FG1848_01_40505_TACCGAGGCCTGAACT_L001_R1_001_H5HGTDRXX.fastq FG1848_01_40505_TACCGAGGCCTGAACT_L001_R2_001_H5HGTDRXX.fastq	15,174,076	31 Jan 2019 12 Feb 2019
FG1848_02	1 ei 2	FG1848_02_40506_CGTTAGAATTCAGGTC_L001_R1_001_H5HGTDRXX.fastq FG1848_02_40506_CGTTAGAATTCAGGTC_L001_R2_001_H5HGTDRXX.fastq	13,304,770	31 Jan 2019 12 Feb 2019
FG1848_03	1 ei 3	FG1848_03_40507_AGCCTCATAGTAGAGA_L001_R1_001_H5HGTDRXX.fastq FG1848_03_40507_AGCCTCATAGTAGAGA_L001_R2_001_H5HGTDRXX.fastq	14,879,363	31 Jan 2019 12 Feb 2019
FG1848_04	1 EL1 1	FG1848_04_40508_GATTCTGCGACGAGAG_L001_R1_001_H5HGTDRXX.fastq FG1848_04_40508_GATTCTGCGACGAGAG_L001_R2_001_H5HGTDRXX.fastq	12,756,861	31 Jan 2019 12 Feb 2019
FG1848_05	1 EL1 2	FG1848_05_40509_TCGTAGTGAGACTTGG_L001_R1_001_H5HGTDRXX.fastq FG1848_05_40509_TCGTAGTGAGACTTGG_L001_R2_001_H5HGTDRXX.fastq	12,954,526	31 Jan 2019 12 Feb 2019
FG1848_06	1 EL1 3	FG1848_06_40510_CTACGACAGAGTCCAA_L001_R1_001_H5HGTDRXX.fastq FG1848_06_40510_CTACGACAGAGTCCAA_L001_R2_001_H5HGTDRXX.fastq	13,345,912	31 Jan 2019 12 Feb 2019
FG1848_07	1 L3 1	FG1848_07_40511_TAAGTGGTCTTAAGCC_L001_R1_001_H5HGTDRXX.fastq FG1848_07_40511_TAAGTGGTCTTAAGCC_L001_R2_001_H5HGTDRXX.fastq	13,197,613	31 Jan 2019 12 Feb 2019
FG1848_08	1 L3 2	FG1848_08_40512_CGGACAACTCCGGATT_L001_R1_001_H5HGTDRXX.fastq FG1848_08_40512_CGGACAACTCCGGATT_L001_R2_001_H5HGTDRXX.fastq	11,776,574	31 Jan 2019 12 Feb 2019
FG1848_09	1 L3 3	FG1848_09_40513_ATATGGATCTGTATTA_L001_R1_001_H5HGTDRXX.fastq FG1848_09_40513_ATATGGATCTGTATTA_L001_R2_001_H5HGTDRXX.fastq	8,237,656	31 Jan 2019 12 Feb 2019
FG1848_10	1 P 1	FG1848_10_40514_GCGCAAGCTCACGCCG_L001_R1_001_H5HGTDRXX.fastq FG1848_10_40514_GCGCAAGCTCACGCCG_L001_R2_001_H5HGTDRXX.fastq	17,504,346	31 Jan 2019 12 Feb 2019
FG1848_11	1 P 2	FG1848_11_40515_AAGATACTACTTACAT_L001_R1_001_H5HGTDRXX.fastq FG1848_11_40515_AAGATACTACTTACAT_L001_R2_001_H5HGTDRXX.fastq	11,277,606	31 Jan 2019 12 Feb 2019
FG1848_12	1 P 3	FG1848_12_40516_GGAGCGTCGTCCGTGC_L001_R1_001_H5HGTDRXX.fastq FG1848_12_40516_GGAGCGTCGTCCGTGC_L001_R2_001_H5HGTDRXX.fastq	13,642,862	31 Jan 2019 12 Feb 2019
FG1848_13	1-F1	FG1848_13_40517_ATGGCATGAAGGTACC_L001_R1_001_H5HGTDRXX.fastq FG1848_13_40517_ATGGCATGAAGGTACC_L001_R2_001_H5HGTDRXX.fastq	22,508,186	31 Jan 2019 12 Feb 2019
FG1848_14	1-F2	FG1848_14_40518_GCAATGCAGGAACGTT_L001_R1_001_H5HGTDRXX.fastq FG1848_14_40518_GCAATGCAGGAACGTT_L001_R2_001_H5HGTDRXX.fastq	13,351,645	31 Jan 2019 12 Feb 2019
FG1848_15	1-F3	FG1848_15_40519_GTTCCAATAATTCTGC_L001_R1_001_H5HGTDRXX.fastq FG1848_15_40519_GTTCCAATAATTCTGC_L001_R2_001_H5HGTDRXX.fastq	13,938,742	31 Jan 2019 12 Feb 2019
FG1848_16	1-M1	FG1848_16_40520_ACCTTGGCGGCCTCAT_L001_R1_001_H5HGTDRXX.fastq FG1848_16_40520_ACCTTGGCGGCCTCAT_L001_R2_001_H5HGTDRXX.fastq	12,708,772	31 Jan 2019 12 Feb 2019
FG1848_17	1-M2	FG1848_17_40521_ATATCTCGATCTTAGT_L001_R1_001_H5HGTDRXX.fastq FG1848_17_40521_ATATCTCGATCTTAGT_L001_R2_001_H5HGTDRXX.fastq	6,886,824	31 Jan 2019 12 Feb 2019
FG1848_18	1-M3	FG1848_18_40522_GCGCTCTAGCTCCGAC_L001_R1_001_H5HGTDRXX.fastq FG1848_18_40522_GCGCTCTAGCTCCGAC_L001_R2_001_H5HGTDRXX.fastq	13,738,769	31 Jan 2019 12 Feb 2019
